# Supplementary material
Source: PubMed Central journal article supplement (PMC3676013)
Supplement: IAI.01185-12_zii999090162so1.pdf [file IAI.01185-12_zii999090162so1.pdf]

type II infected HFF lysate

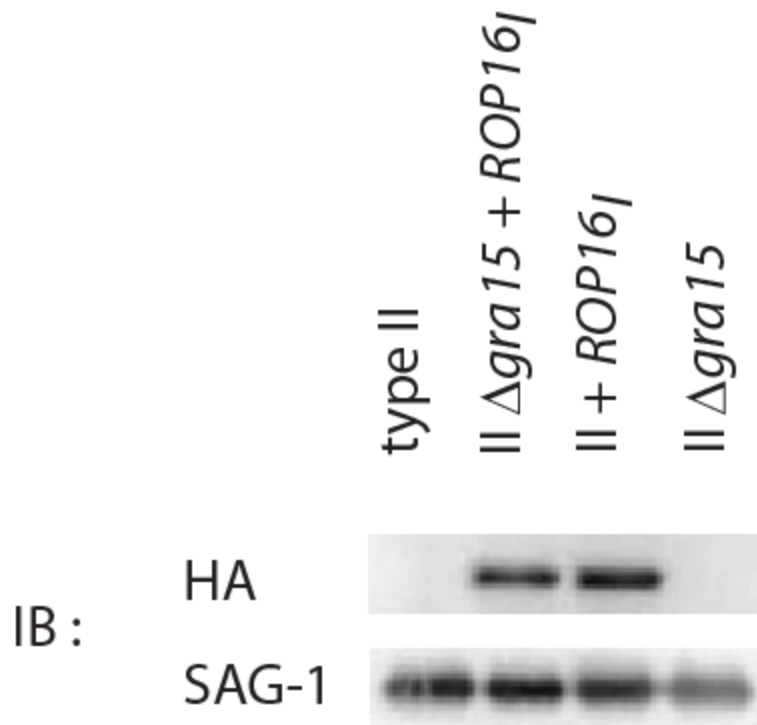

**Figure S1. Similar transgenic ROP16<sub>HA</sub> expression between parasite strains as determined by immuno-blotting.**

Lysates of infected HFFs with the indicated strains were analyzed by Western blotting with specific antibodies for the C-terminal-HA tag on ROP16 as well as the *Toxoplasma* surface protein SAG1 to control for parasite loading.
