# Supplementary material
Source: PubMed Central journal article supplement (PMC3676013)
Supplement: IAI.01185-12_zii999090162so2.pdf [file IAI.01185-12_zii999090162so2.pdf]

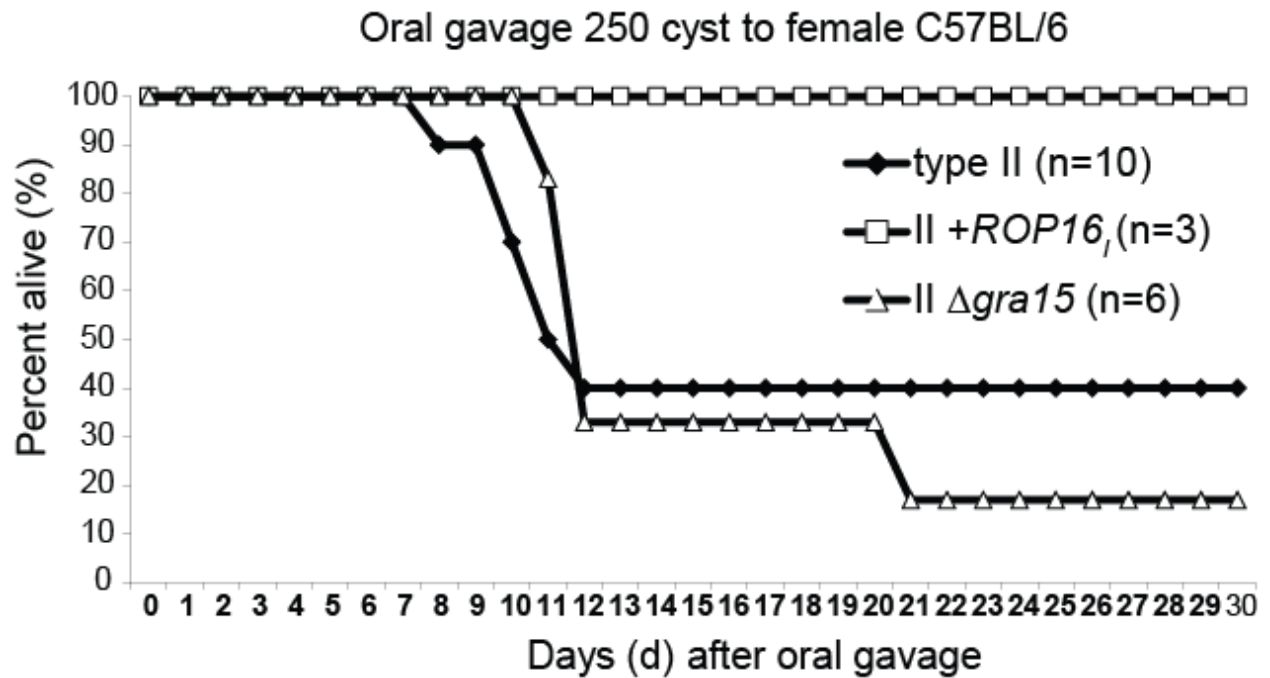

**Figure S2. Mouse susceptibility to oral infection with a challenge dose of 250 cysts.**

Mouse survival following oral challenge of C57BL/6 mice with 250 cysts of the indicated type II Pru strains is shown.
