# Supplementary material
Source: PubMed Central journal article supplement (PMC3676013)
Supplement: IAI.01185-12_zii999090162so3.pdf [file IAI.01185-12_zii999090162so3.pdf]

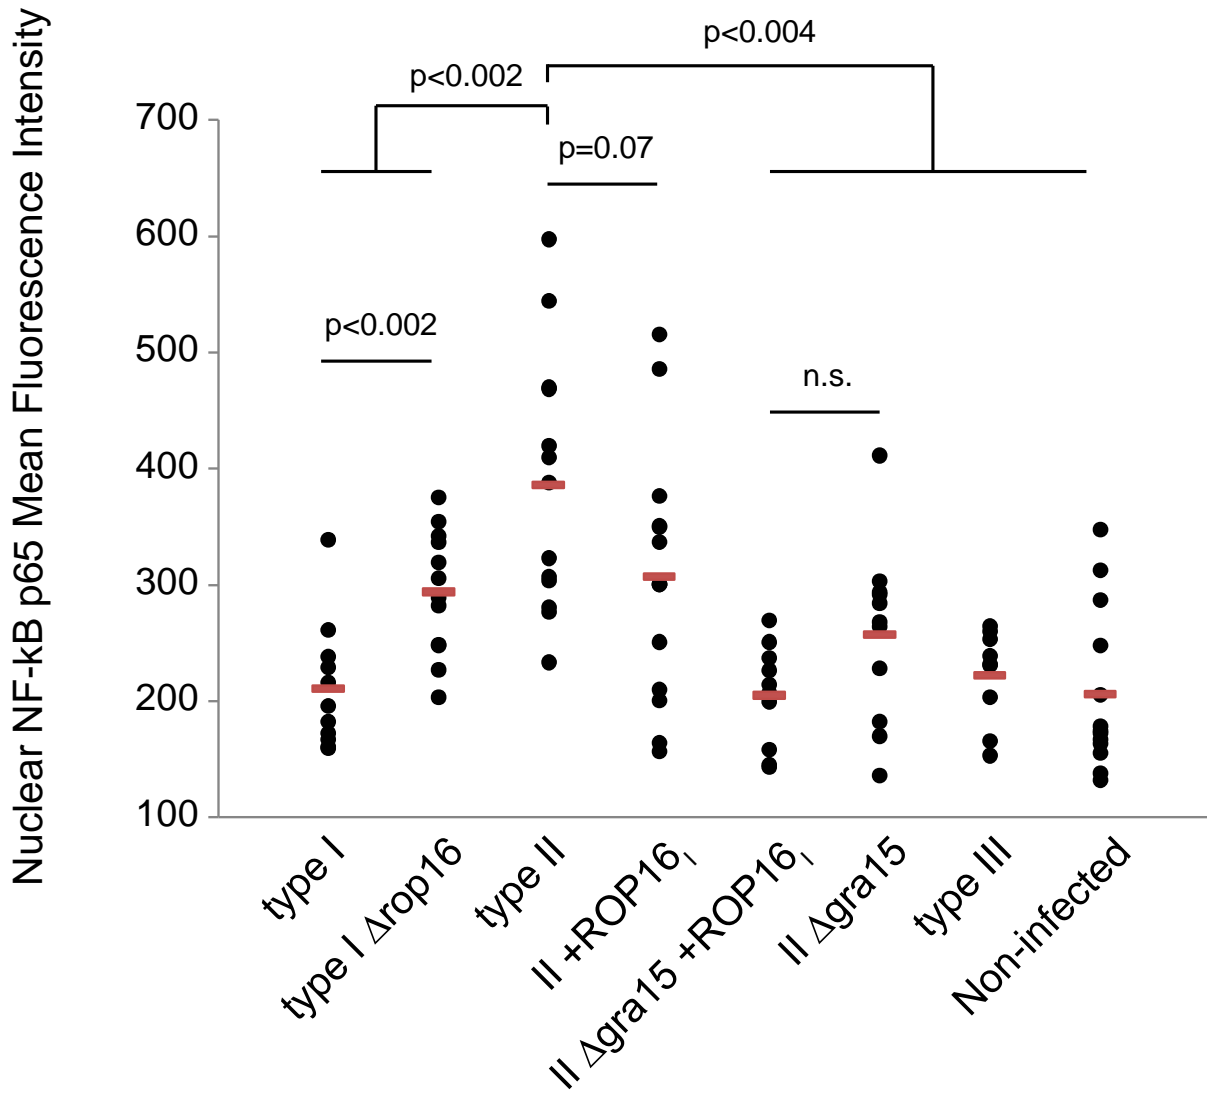

**Figure S3. NF- $\kappa$ B p65 staining intensities within the nucleus of infected macrophages**

BMDMs were infected for 20 hrs and stained with antibodies against NF- $\kappa$ B p65 (RelA). The boundary of the nucleus was determined by Hoechst staining, and the Mean Fluorescence Intensity (MFI) of p65 staining within that boundary was quantified within infected cells for each parasite strain by microscopy. A compilation of non-infected cells found in wells for each experimental infection is also plotted ('non-infected').
