# Supplementary material
Source: PubMed Central journal article supplement (PMC3676013)
Supplement: IAI.01185-12_zii999090162so9.pdf [file IAI.01185-12_zii999090162so9.pdf]

**Table S3. STAT3/6 dependent gene regulation by *Toxoplasma* ROP16 in BMDMs**

| Gene Title                                                    | Gene Symbol  | Fold change ROP16 | Fold STAT6 | Fold STAT3 |
|---------------------------------------------------------------|--------------|-------------------|------------|------------|
| tumor necrosis factor receptor superfamily, member 9 (4-1BB)  | Tnfrsf9      | 3.13              | 1.16       | 1.82       |
| B-cell translocation gene 3                                   | Btg3         | 2.67              | 1.10       | 1.99       |
| DEAH (Asp-Glu-Ala-His) box polypeptide 30                     | Dhx30        | 2.61              | -1.20      | 3.75       |
| platelet-derived growth factor, C polypeptide                 | Pdgfc        | 2.59              | 1.57       | 1.94       |
| signal transducer and activator of transcription 4            | Stat4        | 2.54              | 1.31       | 2.08       |
| proteasome (prosome, macropain) 26S subunit, non-ATPase, 3    | Psmd3        | 2.49              | -1.21      | 2.29       |
| runt related transcription factor 2                           | Runx2        | 2.39              | 1.61       | 2.13       |
| BCL2-associated athanogene 2                                  | Bag2         | 2.35              | 1.32       | 2.22       |
| cytochrome P450, family 27, subfamily a, polypeptide 1        | Cyp27a1      | 2.27              | -1.63      | 4.22       |
| suppressor of cytokine signaling 4                            | Socs4        | 2.04              | 1.43       | 2.73       |
| NCK-associated protein 1                                      | Nckap1       | 2.03              | 1.07       | 2.22       |
| breast cancer 1                                               | Brca1        | 2.01              | 1.29       | 1.94       |
| FK506 binding protein 3                                       | Fkbp3        | 1.80              | 1.21       | 1.84       |
| NLR family, pyrin domain containing 3                         | Nlrp3        | -1.76             | -1.19      | -1.88      |
| chemokine (C-X-C motif) receptor 3                            | Cxcr3        | -1.82             | -1.44      | -2.08      |
| regulator of G-protein signaling 18                           | Rgs18        | -1.83             | -1.34      | 2.06       |
| TAO kinase 3                                                  | Taok3        | -1.86             | -1.28      | -1.97      |
| tumor necrosis factor receptor superfamily, member 13b (TACI) | Tnfrsf13b    | -1.94             | 1.02       | -2.16      |
| plexin D1                                                     | Plxnd1       | -1.95             | -1.29      | -2.32      |
| interferon-induced protein 35                                 | Ifi35        | -1.98             | -1.14      | -1.93      |
| mammary tumor virus receptor 2                                | Mtvr2        | -2.00             | -1.33      | -1.87      |
| interleukin 18 binding protein                                | Il18bp       | -2.03             | 1.31       | -2.45      |
| ADP-ribosylation factor-like 6 interacting protein 5          | Arl6ip5      | -2.05             | -1.32      | -1.97      |
| activating transcription factor 6                             | Atf6         | -2.13             | -1.06      | -1.99      |
| SLAM family member 9                                          | Slamf9       | -2.31             | -1.65      | -2.06      |
| histocompatibility 2, class II, locus Mb1/2                   | H2-DMb1/b2   | -2.32             | -1.37      | -3.70      |
| myxovirus (influenza virus) resistance 1                      | Mx1          | -2.39             | 1.14       | -2.02      |
| mitogen-activated protein kinase kinase kinase 11             | Map3k11      | -2.39             | -1.36      | -2.21      |
| carnitine palmitoyltransferase 1a, liver                      | Cpt1a        | -2.41             | 1.07       | -2.27      |
| toll-like receptor 7                                          | Tlr7         | -2.53             | -1.67      | -1.94      |
| T-cell specific GTPase /// T-cell specific GTPase 2           | Tgtp / Tgtp2 | -2.55             | -1.06      | -1.82      |
| histocompatibility (minor) HA-1                               | Hmha1        | -2.65             | -1.52      | -2.18      |
| linker for activation of T cells family, member 2             | Lat2         | -2.78             | -1.17      | -2.56      |
| tumor necrosis factor (ligand) superfamily, member 12 (TWEAK) | Tnfsf12      | -2.96             | -1.06      | -2.10      |
| TRAF-interacting protein with forkhead-associated domain      | Tifa         | -2.97             | -1.55      | -1.95      |
| Nfat activating molecule with ITAM motif 1                    | Nfam1        | -3.11             | -1.74      | -2.15      |
| triggering receptor expressed on myeloid cells 2              | Trem2        | -3.17             | -1.59      | -3.08      |
| interferon-induced protein with tetratricopeptide repeats 3   | Ifit3        | -3.82             | -1.20      | -1.97      |
| coagulation factor V                                          | F5           | -4.01             | -1.57      | 2.03       |
| thioredoxin interacting protein                               | Txnip        | -4.71             | -1.45      | -3.46      |

| Gene Title                                                   | Gene Symbol   | Fold change ROP16 | Fold STAT6 | Fold STAT3 |
|--------------------------------------------------------------|---------------|-------------------|------------|------------|
| chitinase 3-like 3                                           | Chi3l3        | 9.24              | 53.67      | 2.03       |
| arginase, liver                                              | Arg1          | 6.99              | 2.86       | -3.44      |
| signaling lymphocytic activation molecule family member 1    | Slamf1        | 5.80              | 4.53       | 2.05       |
| preproenkephalin                                             | Penk          | 4.33              | 1.88       | 2.07       |
| lymphocyte antigen 75                                        | Ly75          | 3.71              | 2.21       | -2.19      |
| cytochrome P450, family 1, subfamily b, polypeptide 1        | Cyp1b1        | 2.93              | 3.47       | -1.85      |
| matrix metalloproteinase 12                                  | Mmp12         | 2.25              | 2.04       | -1.82      |
| chemokine (C-X3-C) receptor 1                                | Cx3cr1        | 2.01              | -1.92      | 1.90       |
| intraflagellar transport 20 homolog (Chlamydomonas)          | Ift20         | -1.74             | -1.93      | -2.23      |
| Fc receptor, IgG, low affinity IIb                           | Fcgr2b        | -1.89             | -2.00      | -2.51      |
| allograft inflammatory factor 1                              | Aif1          | -2.20             | -1.95      | -1.96      |
| serum amyloid A 3                                            | Saa3          | -2.24             | -1.79      | -1.77      |
| complement factor B                                          | Cfb           | -2.24             | -2.07      | -2.02      |
| apolipoprotein E                                             | ApoE          | -2.96             | -1.81      | -2.48      |
| signal transducer and activator of transcription 2           | Stat2         | -3.64             | 1.75       | -3.65      |
| growth arrest specific 6                                     | Gas6          | -3.65             | -2.20      | -1.91      |
| resistin like alpha                                          | Retnla        | 26.98             | 20.33      | 1.44       |
| eosinophil-associated, ribonuclease A family, member 11      | Ear11         | 23.59             | 11.88      | -1.21      |
| chitinase 3-like 3 /// chitinase 3-like 4                    | Chi3l3/Chi3l4 | 12.23             | 33.05      | 1.27       |
| programmed cell death 1 ligand 2 (B7-DC)                     | Pdcd1lg2      | 8.71              | 5.76       | 1.31       |
| chemokine (C-C motif) ligand 8                               | Ccl8          | 5.36              | 16.25      | -1.59      |
| chitinase 3-like 4                                           | Chi3l4        | 5.25              | 4.46       | -1.31      |
| chemokine (C-C motif) ligand 24                              | Ccl24         | 3.86              | 5.57       | 1.43       |
| serine (or cysteine) peptidase inhibitor, clade A, member 3G | Serpina3g     | 3.30              | 2.48       | 1.14       |
| prostaglandin-endoperoxide synthase 1 (COX-1)                | Ptgs1         | 3.11              | 1.98       | -1.45      |
| heparin-binding EGF-like growth factor                       | Hbegf         | 3.01              | 2.86       | -1.29      |
| splA/ryanodine receptor domain and SOCS box containing 1     | Spsb1         | 2.92              | 3.91       | 1.54       |
| vitamin D receptor                                           | Vdr           | 2.74              | 1.81       | -1.35      |
| matrix metalloproteinase 13                                  | Mmp13         | 2.73              | 6.96       | -1.67      |
| integrin alpha X                                             | Itgax         | 2.49              | 1.99       | 1.33       |
| interleukin 2 receptor, alpha chain                          | Il2ra         | 2.11              | 1.81       | -1.25      |
| tetraspanin 7                                                | Tspan7        | 2.00              | 1.82       | -1.44      |
| serine (or cysteine) peptidase inhibitor, clade B, member 9  | Serpib9       | 1.88              | 1.75       | 1.55       |
| CD36 antigen                                                 | Cd36          | 1.81              | 2.32       | 1.27       |
| mannose receptor, C type 1                                   | Mrc1          | 1.80              | 2.05       | 1.02       |
| interleukin 11 receptor, alpha chain 1                       | Il11ra1/ra2   | 1.74              | 1.96       | 1.54       |
| matrix metalloproteinase 14 (membrane-inserted)              | Mmp14         | -1.76             | -1.76      | -1.13      |
| ATG2 autophagy related 2 homolog A (S. cerevisiae)           | Atg2a         | -1.76             | -1.77      | -1.55      |
| HtrA serine peptidase 1                                      | Htra1         | -1.77             | -1.75      | 1.56       |
| interleukin 1 receptor, type I                               | Il1r1         | -1.81             | 2.00       | -1.54      |
| chemokine (C-C motif) receptor 1                             | Ccr1          | -1.81             | 1.79       | -1.65      |

| Gene Title                                                   | Gene Symbol | Fold change ROP16 | Fold STAT6 | Fold STAT3 |
|--------------------------------------------------------------|-------------|-------------------|------------|------------|
| interleukin 6 receptor, alpha                                | Il6ra       | -1.85             | -2.03      | -1.17      |
| SLIT-ROBO Rho GTPase activating protein 2                    | Srgap2      | -1.89             | -2.36      | -1.31      |
| AXL receptor tyrosine kinase                                 | Axl         | -1.97             | -1.84      | -1.63      |
| anthrax toxin receptor 1                                     | Antxr1      | -1.99             | -2.26      | 1.17       |
| tumor necrosis factor alpha induced protein 6                | Tnfaip6     | -1.99             | 1.78       | 1.48       |
| protein tyrosine phosphatase, non-receptor type 6            | Ptpn6       | -2.30             | -1.77      | -1.19      |
| paired immunoglobulin-like type 2 receptor alpha             | Pilra       | -2.37             | -2.63      | -1.24      |
| paired immunoglobulin-like type 2 receptor beta 1            | Pilrb1      | -2.49             | -3.03      | -1.09      |
| lymphoblastomic leukemia 1                                   | Lyl1        | -2.68             | -2.12      | 1.28       |
| cytokine inducible SH2-containing protein                    | Cish        | 4.07              | 1.63       | 1.28       |
| tissue inhibitor of metalloproteinase 1                      | Timp1       | 3.10              | 1.61       | 1.17       |
| cellular retinoic acid binding protein II                    | Crabp2      | 3.08              | -1.22      | 1.18       |
| C-type lectin domain family 4, member b1                     | Clec4b1     | 2.84              | 1.19       | 1.24       |
| alanine and arginine rich domain containing protein          | Aard        | 2.75              | 1.32       | -1.15      |
| vascular cell adhesion molecule 1                            | Vcam1       | 2.63              | 1.55       | 1.03       |
| suppressor of cytokine signaling 2                           | Socs2       | 2.48              | 1.21       | 1.11       |
| basic leucine zipper transcription factor, ATF-like 3        | Batf3       | 2.23              | 1.10       | -1.30      |
| glutamate-rich WD repeat containing 1                        | Grwd1       | 2.18              | -1.07      | 1.36       |
| chemokine (C-C motif) ligand 6                               | Ccl6        | 2.15              | 1.30       | 1.46       |
| thymic stromal lymphopoietin                                 | Tslp        | 2.08              | -1.12      | -1.32      |
| gap junction protein, alpha 1                                | Gja1        | 2.03              | 1.50       | 1.60       |
| interferon regulatory factor 4                               | Irf4        | 2.02              | 1.46       | -1.17      |
| peroxisome proliferator activated receptor gamma             | Pparg       | 2.00              | 1.46       | 1.32       |
| protein tyrosine phosphatase, non-receptor type 2            | Ptpn2       | 1.96              | 1.61       | -1.08      |
| aldehyde dehydrogenase 18 family, member A1                  | Aldh18a1    | 1.94              | 1.28       | 1.43       |
| cyclin D2                                                    | Ccnd2       | 1.94              | -1.17      | -1.57      |
| COX15 homolog, cytochrome c oxidase assembly protein (yeast) | Cox15       | 1.93              | 1.27       | 1.73       |
| CD244 natural killer cell receptor 2B4                       | Cd244       | 1.91              | 1.09       | 1.10       |
| phospholipase A2, group XV                                   | Pla2g15     | 1.91              | -1.33      | -1.19      |
| Von Willebrand factor homolog                                | Vwf         | 1.90              | 1.17       | 1.34       |
| interleukin 12 receptor, beta 2                              | Il12rb2     | 1.87              | 1.61       | 1.26       |
| leukocyte-associated Ig-like receptor 1                      | Lair1       | 1.87              | -1.31      | 1.16       |
| SLAM family member 8                                         | Slamf8      | 1.83              | 1.16       | -1.04      |
| basic leucine zipper transcription factor, ATF-like          | Batf        | 1.82              | -1.65      | 1.12       |
| metallothionein 1                                            | Mt1         | 1.80              | 1.11       | 1.50       |
| retinoid X receptor alpha                                    | Rxra        | 1.76              | -1.12      | 1.25       |
| NLR family member X1                                         | NlrX1       | 1.75              | -1.16      | 1.42       |
| Jun dimerization protein 2                                   | Jdp2        | 1.74              | 1.69       | 1.29       |
| tetraspanin 5                                                | Tspan5      | 1.74              | 1.05       | 1.23       |
| CD5 antigen-like                                             | Cd5l        | -1.74             | -1.35      | -1.21      |
| integrin beta 7                                              | Itgb7       | -1.74             | -1.41      | -1.13      |

| Gene Title                                                | Gene Symbol | Fold change ROP16 | Fold STAT6 | Fold STAT3 |
|-----------------------------------------------------------|-------------|-------------------|------------|------------|
| forkhead box J2                                           | Foxj2       | -1.75             | -1.30      | -1.20      |
| histocompatibility 2, class II antigen A, beta 1          | H2-Ab1      | -1.76             | -1.59      | -1.18      |
| MARCKS-like 1                                             | Marcksl1    | -1.77             | -1.69      | -1.37      |
| protein tyrosine phosphatase, non-receptor type 1         | Ptpn1       | -1.78             | -1.34      | -1.61      |
| apolipoprotein B48 receptor                               | Apob48r     | -1.79             | -1.27      | -1.13      |
| arginase type II                                          | Arg2        | -1.80             | -1.59      | -1.32      |
| interferon regulatory factor 7                            | Irf7        | -1.80             | -1.36      | -1.53      |
| chemokine (C-X-C motif) ligand 1                          | Cxcl1       | -1.81             | -1.25      | -1.39      |
| unc-93 homolog B1 (C. elegans)                            | Unc93b1     | -1.81             | -1.36      | -1.16      |
| interleukin 12b                                           | Il12b       | -1.81             | -1.33      | -1.65      |
| FMS-like tyrosine kinase 4                                | Flt4        | -1.81             | 1.32       | 1.64       |
| integrin beta 5                                           | Itgb5       | -1.82             | -1.18      | -1.10      |
| lectin, galactose binding, soluble 9                      | Lgals9      | -1.82             | -1.30      | -1.47      |
| protein tyrosine phosphatase, receptor type, A            | Ptpa        | -1.83             | -1.70      | -1.73      |
| interleukin 13 receptor, alpha 1                          | Il13ra1     | -1.83             | -1.03      | -1.30      |
| cAMP responsive element modulator                         | Crem        | -1.83             | 1.06       | 1.46       |
| Fc receptor, IgG, low affinity IV                         | Fcgr4       | -1.84             | -1.13      | -1.30      |
| suppressor of cytokine signaling 5                        | Socs5       | -1.84             | -1.22      | -1.44      |
| mitogen-activated protein kinase kinase kinase kinase 4   | Map4k4      | -1.85             | 1.25       | -1.15      |
| purinergic receptor P2X, ligand-gated ion channel, 5      | P2rx5       | -1.86             | -1.20      | -1.68      |
| lysosomal trafficking regulator                           | Lyst        | -1.88             | -1.02      | -1.19      |
| peptidyl arginine deiminase, type II                      | Padi2       | -1.89             | -1.15      | -1.26      |
| poly (ADP-ribose) polymerase family, member 3             | Parp3       | -1.90             | -1.15      | -1.20      |
| creatine kinase, brain                                    | Ckb         | -1.91             | -1.30      | -1.53      |
| protein tyrosine phosphatase-like A domain containing 2   | Ptplad2     | -1.91             | -1.19      | -1.15      |
| interleukin 6                                             | Il6         | -1.92             | 1.05       | -1.30      |
| CD276 antigen (B7-H3)                                     | Cd276       | -1.92             | -1.07      | -1.34      |
| CD72 antigen                                              | Cd72        | -1.93             | -1.24      | -1.47      |
| glia maturation factor, gamma                             | Gmfg        | -1.94             | -1.53      | 1.42       |
| Fc receptor, IgG, high affinity I                         | Fcgr1       | -1.95             | -1.33      | -1.69      |
| plasminogen activator, tissue                             | Plat        | -1.96             | -1.37      | 1.32       |
| CD99 antigen                                              | Cd99        | -1.97             | -1.22      | -1.70      |
| sequestosome 1                                            | Sqstm1      | -1.99             | -1.20      | -1.51      |
| prostaglandin D2 synthase 2, hematopoietic                | Ptgds2      | -2.00             | -1.36      | -1.50      |
| coronin, actin binding protein 1A                         | Coro1a      | -2.02             | -1.35      | -1.39      |
| CD28 antigen                                              | Cd28        | -2.04             | 1.36       | -1.39      |
| colony stimulating factor 2 (granulocyte-macrophage)      | Csf2        | -2.09             | -1.65      | -1.18      |
| tissue inhibitor of metalloproteinase 2                   | Timp2       | -2.10             | -1.41      | -1.28      |
| signal-induced proliferation-associated 1 like 2          | Sipa1l2     | -2.11             | -1.34      | -1.07      |
| ArfGAP with RhoGAP domain, ankyrin repeat and PH domain 3 | Arap3       | -2.12             | -1.65      | -1.17      |
| CD70 antigen                                              | Cd70        | -2.13             | -1.59      | -1.61      |

| Gene Title                                                    | Gene Symbol | Fold change ROP16 | Fold STAT6 | Fold STAT3 |
|---------------------------------------------------------------|-------------|-------------------|------------|------------|
| immunoglobulin superfamily, member 6                          | Igsf6       | -2.14             | -1.64      | -1.31      |
| Rho GTPase activating protein 9                               | Arhgap9     | -2.20             | -1.51      | -1.29      |
| plexin B2                                                     | Plxnb2      | -2.23             | -1.66      | 1.27       |
| ATP-binding cassette, sub-family C (CFTR/MRP), member 3       | Abcc3       | -2.25             | -1.47      | -1.45      |
| coagulation factor XIII, A1 subunit                           | F13a1       | -2.26             | -1.55      | 1.33       |
| complement component 3a receptor 1                            | C3ar1       | -2.30             | -1.33      | -1.46      |
| immunity-related GTPase family M member 2                     | Irgm2       | -2.31             | 1.08       | -1.66      |
| interleukin 23, alpha subunit p19                             | Il23a       | -2.31             | -1.01      | -1.35      |
| chemokine (C-X-C motif) ligand 10                             | Cxcl10      | -2.32             | 1.04       | -1.15      |
| paired-Ig-like receptor A2                                    | Pira2       | -2.45             | 1.10       | -1.50      |
| toll-like receptor 2                                          | Tlr2        | -2.50             | -1.33      | -1.10      |
| high mobility group AT-hook 2                                 | Hmga2       | -2.69             | -1.11      | -1.44      |
| FBJ osteosarcoma oncogene                                     | Fos         | -2.72             | -1.20      | -1.32      |
| thrombospondin 1                                              | Thbs1       | -2.72             | 1.37       | 1.36       |
| aryl-hydrocarbon receptor repressor                           | Ahrr        | -2.79             | 1.23       | -1.23      |
| Notch gene homolog 1 (Drosophila)                             | Notch1      | -2.93             | -1.41      | -1.63      |
| UDP-GlcNAc:betaGal beta-1,3-N-acetylglucosaminyltransferase 5 | B3gnt5      | -3.47             | 1.58       | -1.30      |
| DNA-damage-inducible transcript 4                             | Ddit4       | -4.62             | -1.05      | -1.59      |

**Table S3. STAT3/6 dependent gene regulation by *Toxoplasma* ROP16 in BMDMs**

A shortened list of the 938 uniquely annotated genes whose expression was regulated by ROP16 at least 1.7 fold ( $0.8 < \text{Absolute value of the } \text{Log}_2 \text{ ratio } [+ROP16_i / \text{control infection}]$ ) when comparing type II vs. II+*ROP16<sub>i</sub>*, or II  $\Delta$ *gra15* vs. II  $\Delta$ *gra15* +*ROP16<sub>i</sub>* infected BMDMs. ‘Fold ROP16’ is the greatest difference in gene expression due to *Toxoplasma* ROP16 obtained from these comparisons. Negative values indicated ROP16 downregulated gene expression. The ‘Fold STAT3’ indicates how the ‘Fold ROP16’ value changes when comparing similar infections in wild type and STAT3 deficient macrophages ( $0.8 < \text{Absolute value of the } \text{Log}_2 [+ROP16_i / \text{control infection in wild type BMDMs}] - \text{Log}_2 [+ROP16_i / \text{control infection in } Stat3 \text{ deficient BMDMs}]$ ); ‘Fold STAT6’ is the absolute difference in gene expression between wild type and *Stat6*<sup>-/-</sup> BMDMs infected with the II+*ROP16<sub>i</sub>* strain. In order for a gene to have been categorized as STAT3 or STAT6 regulated that difference had to be at least  $\pm 1.7$  fold in the

aforementioned comparisons. Negative values indicate the gene expression or 'Fold ROP16' expression value was reduced in the wild type compared to STAT-deficient BMDMs (i.e. the STAT-pathway acted as a repressor); positive values indicate the 'Fold ROP16' expression value increased in the wild type compared to STAT-deficient BMDMs (i.e. the STAT-pathway induced gene expression). Highlighted in periwinkle are genes that are modulated by STAT3, forest green STAT6, orange by both STAT3 and STAT6, and peach neither STAT3 nor STAT6 host transcription factors.
